# Supplementary material
Source: publisher site journal article supplement (https://www.dovepress.com/article/598572)
Supplement: Supplementary file 1 [file 598572%20Supplementary%20Material.docx]

**SUPPLEMENTARY MATERIALS**

**Table S1.** Cox regression model for predictors of drug persistence considering a refill of at least 3 prescriptions in a time interval ≥37 days.

|  | **HR** | **95% CI** | **p** |
| --- | --- | --- | --- |
| Refill +37d (Ref.: ≥3 prescriptions) |  |  |  |
| <3 prescriptions | 1.038 | [0.7; 1.6] | 0.870 |
| Age (Ref.: 18-65 years) |  |  |  |
| 66-70 years | 1.558 | [0.7; 3.4] | 0.259 |
| 71-80 years | 1.569 | [0.8; 3.1] | 0.193 |
| ≥80 years | 1.583 | [0.7; 3.7] | 0.289 |
| Sex (Ref.: female) |  |  |  |
| Male | 0.769 | [0.5; 1.2] | 0.259 |
| CCI (Ref.: 0) |  |  |  |
| 1-2 | 0.906 | [0.5; 1.6] | 0.723 |
| ≥3 | 1.178 | [0.4; 3.1] | 0.740 |
| Cardiovascular disease | 0.802 | [0.4; 1.7] | 0.579 |
| Atrial fibrillation | - | - | - |
| Heart failure | 1.072 | [0.2; 4.7] | 0.927 |
| Hypertension | 1.300 | [0.8; 2.2] | 0.314 |
| Diabetes | 1.640 | [0.9; 3.2] | 0.139 |
| Hypercholesterolemia | 0.600 | [0.3; 1.0] | 0.073 |

***Abbreviations:*** CCI, Charlson Comorbidity Index; CI, confidence interval; CLL, chronic lymphocytic leukemia; HR, hazard ratio

**Table S2.** Cox regression model for predictors of drug persistence considering a refill of at least 3 prescriptions in a time interval ≥40 days.

|  | **HR** | **95% CI** | **p** |
| --- | --- | --- | --- |
| Refill +40d (Ref.: ≥3 prescriptions) |  |  |  |
| <3 prescriptions | 1.076 | [0.7; 1.7] | 0.756 |
| Age (Ref.: 18-65 years) |  |  |  |
| 66-70 years | 1.544 | [0.7; 3.3] | 0.271 |
| 71-80 years | 1.570 | [0.8; 3.1] | 0.192 |
| ≥80 years | 1.598 | [0.7; 3.7] | 0.281 |
| Sex (Ref.: female) |  |  |  |
| Male | 0.76501 | [0.5; 1.2] | 0.249 |
| CCI (Ref.: 0) |  |  |  |
| 1-2 | 0.897 | [0.5; 1.6] | 0.700 |
| ≥3 | 1.174 | [0.4; 3.1] | 0.744 |
| Cardiovascular disease | 0.798 | [0.4; 1.7] | 0.568 |
| Atrial fibrillation | - | - | - |
| Heart failure | 1.074 | [0.2; 4.7] | 0.925 |
| Hypertension | 1.305 | [0.8; 2.2] | 0.308 |
| Diabetes | 1.638 | [0.9; 3.1] | 0.139 |
| Hypercholesterolemia | 0.597 | [0.3; 1.0] | 0.071 |

***Abbreviations:*** CCI, Charlson Comorbidity Index; CI, confidence interval; CLL, chronic lymphocytic leukemia; HR, hazard ratio

**Table S3.** Cox regression model for predictors of drug persistence considering a refill of at least 3 prescriptions in a time interval ≥45 days.

|  | **HR** | **95% CI** | **p** |
| --- | --- | --- | --- |
| Refill +45d (Ref.: ≥3 prescriptions) |  |  |  |
| <3 prescriptions | 0.962 | [0.6; 1.5] | 0.871 |
| Age (Ref.: 18-65 years) |  |  |  |
| 66-70 years | 1.558 | [0.7; 3.4] | 0.260 |
| 71-80 years | 1.573 | [0.8; 3.1] | 0.190 |
| ≥80 years | 1.575 | [0.7; 3.7] | 0.295 |
| Sex (Ref.: female) |  |  |  |
| Male | 0.778 | [0.5; 1.2] | 0.279 |
| CCI (Ref.: 0) |  |  |  |
| 1-2 | 0.909 | [0.5; 1.6] | 0.733 |
| ≥3 | 1.192 | [0.5; 3.1] | 0.721 |
| Cardiovascular disease | 0.804 | [0.4; 1.8] | 0.584 |
| Atrial fibrillation | - | - | - |
| Heart failure | 1.072 | [0.2; 4.7] | 0.927 |
| Hypertension | 1.285 | [0.8; 2.2] | 0.342 |
| Diabetes | 1.634 | [0.8; 3.1] | 0.142 |
| Hypercholesterolemia | 0.604 | [0.3; 1.1] | 0.078 |

***Abbreviations:*** CCI, Charlson Comorbidity Index; CI, confidence interval; CLL, chronic lymphocytic leukemia; HR, hazard ratio

**Table S4.** Cox regression model for predictors of drug persistence considering a refill of at least 2 prescriptions in a time interval ≥45 days.

|  | **HR** | **95% CI** | **p** |
| --- | --- | --- | --- |
| Refill +45d (Ref.: ≥2 prescriptions) |  |  |  |
| <2 prescriptions | 1.147 | [0.7; 1.8] | 0.558 |
| Age (Ref.: 18-65 years) |  |  |  |
| 66-70 years | 1.546 | [0.7; 3.3] | 0.268 |
| 71-80 years | 1.539 | [0.8; 3.0] | 0.215 |
| ≥80 years | 1.587 | [0.7; 3.7] | 0.286 |
| Sex (Ref.: female) |  |  |  |
| Male | 0.756 | [0.5; 1.2] | 0.230 |
| CCI (Ref.: 0) |  |  |  |
| 1-2 | 0.904 | [0.5; 1.6] | 0.718 |
| ≥3 | 1.158 | [0.4; 3.0] | 0.764 |
| Cardiovascular disease | 0.813 | [0.4; 1.8] | 0.603 |
| Atrial fibrillation | - | - | - |
| Heart failure | 1.110 | [0.3; 4.9] | 0.890 |
| Hypertension | 1.328 | [0.8; 2.2] | 0.282 |
| Diabetes | 1.645 | [0.9; 3.2] | 0.136 |
| Hypercholesterolemia | 0.595 | [0.3; 1.0] | 0.069 |
